# Supplementary material for: Environmental and biological controls on Na / Ca ratios in scleractinian cold-water corals
Source: Copernicus journal article supplement (doi:10.5194/bg-2019-40), 2019-02-19
Supplement: Supplementary file 1 [file bg-2019-40-supplement.pdf]

| Samplename | Location                                       | Species | Coordinates                | Waterdepth [m] | Temperature [°C] | Salinity [PSU] | Reference                                             |
|------------|------------------------------------------------|---------|----------------------------|----------------|------------------|----------------|-------------------------------------------------------|
| A1 - A4    | Traenadjupet, Norwegian Sea                    | L       | 66°58.400'N<br>11°06.529'E | 300            | 7.2              | 35.2           | Dullo et al. (2008), Rüggeberg et al. (2011)          |
| B1 - B2    | Whittard Canyon, Celtic Sea                    | L       | 48°46.79'N<br>10°34.20'W   | 835            | 9.79             | 35.5           | Raddatz et al. (2013)                                 |
| C1 - C2    | Stjernsund Fjord, Norwegian Sea                | L       | 70°16.04'N<br>22°27.37'E   | 295            | 5.9              | 35             | Rüggeberg et al. (2011)                               |
| D1 - D4    | Little Galway Mound, Belgica Mound Province    | L       | 51°26.51'N<br>11°45.43'W   | 881            | 8.96             | 35.53          | Dullo et al. (2008), Rüggeberg et al. (2011)          |
| E1 - E3    | Santa Maria di Leuca, Ionic Sea                | L       | 39°125.00'N<br>18°127.00'E | 560-750        | 13.66            | 38.66          | Flögel et al. (2014)                                  |
| F1 - F4    | Guilvinec Canyon, Bay of Biscay                | L       | 46°56.20'N<br>5°21.60'W    | 800            | 10.29            | 35.6           | Raddatz et al. (2013)                                 |
| G1 - G4    | Sotbakken, Norwegian Sea                       | L       | 70°45.35'N<br>18°40.04'E   | 265            | 6.6              | 35.2           | Raddatz et al. (2013)                                 |
| H1 - H3    | Galway Mound, Belgica Mound Province           | L       | 51°26.94'N<br>11°45.16'E   | 837            | 9.54             | 35.53          | Dullo et al. (2008), Rüggeberg et al. (2011)          |
| I1 - I3    | Urania Bank, Strait of Sicily                  | L       | 36°50.32'N<br>13°09.35'E   | 559            | 13.5             | 38.8           | Raddatz et al. (2013), López Correa et al. (2010)     |
| J1 - J2    | Meknes Carbonate Mound Province, Gulf of Cadiz | L       | 34.59.98'N<br>7°04.51'W    | 738            | 10.28            | 35.7           | Raddatz et al. (2013)                                 |
| K1 - K5    | Trondheimfjord, Norwegian Sea                  | L       | 63°28.61'N<br>9°59.72'E    | 240            | 8.1              | 31.2           | Dullo et al. (2008), Rüggeberg et al. (2011)          |
| LO1        | Bari Canyon, Adriatic Sea                      | L       | 41°18.00'N<br>17°12.00'E   | 315-650        | 13.49            | 38.62          | Flögel et al. (2014)                                  |
| MSS1       | Santa Maria di Leuca, Ionic Sea                | L       | 39°25.00'N<br>18°27.00'E   | 560-750        | 13.66            | 38.66          | Flögel et al. (2014)                                  |
| MA1        | Bari Canyon, Adriatic Sea                      | M       | 41°18.00'N<br>17°12.00'E   | 315-650        | 13.49            | 38.62          | Flögel et al. (2014)                                  |
| MSM1       | Campeche Bank, Gulf of Mexico                  | L       | 23°50.121'N<br>87°10.484'W | 565            | 10.59            | 35.24          | WOA 2013 (Locarnini et al., 2013; Zweng et al., 2013) |
| MSM2       | Great Bahama Bank Mound E, Northwest Atlantic  | L       | 24°35.623'N<br>79°16.808'W | 579            | 9.24             | 35.084         | WOA 2013 (Locarnini et al., 2013; Zweng et al., 2013) |

|             |                                                     |   |                            |     |       |        |                                                                |
|-------------|-----------------------------------------------------|---|----------------------------|-----|-------|--------|----------------------------------------------------------------|
| MSM3        | Great Bahama Bank<br>Mound B,<br>Northwest Atlantic | M | 24°33.848'N<br>79°19.811'W | 616 | 9.27  | 35.1   | WOA 2013<br>(Locarnini et al.,<br>2013; Zweng et<br>al., 2013) |
| MSM4        | Southwest Florida,<br>Gulf of Mexico                | L | 24°58.164'N<br>84°17.973'W | 483 | 8.29  | 35.17  | WOA 2013<br>(Locarnini et al.,<br>2013; Zweng et<br>al., 2013) |
| ALB1        | El Idrissi Bank,<br>Alboran Sea                     | L | 36°06.31'N<br>3°29.33'E    | 647 | 12.98 | 38.464 | WOA 2013<br>(Locarnini et al.,<br>2013; Zweng et<br>al., 2013) |
| KRS1        | Northeastern Red<br>Sea                             | C | 27°42.306'N<br>35°09.046'E | 954 | 21.66 | 40.55  | WOA 2013<br>(Locarnini et al.,<br>2013; Zweng et<br>al., 2013) |
| KRS2        | Northeastern Red<br>Sea                             | C | 27°42.306'N<br>35°09.046'E | 580 | 21.66 | 40.55  | WOA 2013<br>(Locarnini et al.,<br>2013; Zweng et<br>al., 2013) |
| KRS3        | Northeastern Red<br>Sea                             | C | 27°42.306'N<br>35°09.046'E | 954 | 21.66 | 40.55  | WOA 2013<br>(Locarnini et al.,<br>2013; Zweng et<br>al., 2013) |
| KRS4        | Northeastern Red<br>Sea                             | C | 27°42.306'N<br>35°09.046'E | 954 | 21.66 | 40.55  | WOA 2013<br>(Locarnini et al.,<br>2013; Zweng et<br>al., 2013) |
| KRS5        | Northeastern Red<br>Sea                             | C | 27°42.306'N<br>35°09.046'E | 954 | 21.66 | 40.55  | WOA 2013<br>(Locarnini et al.,<br>2013; Zweng et<br>al., 2013) |
| L10-1       | Tautra Reef,<br>Norwegian Sea                       | L | 63°35.36'N<br>10°31.23'E   | 39  | 6     | 30.1   | Neulinger<br>(2008)                                            |
| L2-1 – L2-2 | Lopphavet,<br>Norwegian Sea                         | L | 70°26.80'N<br>21°10.38'E   | 230 | 6.5   | 35.1   | Raddatz et al.<br>(2013)                                       |
| L3-1 – L3-2 | Lopphavet,<br>Norwegian Sea                         | L | 70°26.80'N<br>21°10.38'E   | 230 | 6.5   | 35.1   | Raddatz et al.<br>(2013)                                       |
| L5-1 – L5-2 | Stjernesund Fjord,<br>Norwegian Sea                 | L | 70°16.04'N<br>22°27.37'E   | 295 | 5.9   | 35     | Rüggeberg et al.<br>(2011)                                     |
| L6-1 – L6-2 | Sula Reef,<br>Norwegian Sea                         | L | 64°05.93'N<br>8°05.47'E    | 286 | 7.6   | 35.3   | Raddatz et al.<br>(2013)                                       |
| L7-1 – L7-2 | Sula Reef,<br>Norwegian Sea                         | L | 64°05.93'N<br>8°05.47'E    | 286 | 7.6   | 35.3   | Raddatz et al.<br>(2013)                                       |
| L8-1 – L8-2 | Nordleksa,<br>Norwegian Sea                         | L | 63°36.43'N<br>9°22.66'E    | 155 | 7.8   | 35     | Dr. S. Flögel                                                  |
| LR1 – LR6   | Lopphavet,<br>Norwegian Sea                         | L | 70°26.59'N<br>21°10.00'E   | 230 | 6.5   | 35.1   | Raddatz et al.<br>(2013)                                       |
| LW1 – LW5   | Lopphavet,<br>Norwegian Sea                         | L | 70°26.59'N<br>21°10.00'E   | 230 | 6.5   | 35.1   | Raddatz et al.<br>(2013)                                       |
| NL-1 – NL6  | Nordleksa,<br>Norwegian Sea                         | L | 63°36.43'N<br>9°22.66'E    | 155 | 7.8   | 35     | Dr. S. Flögel                                                  |

|                 |                                     |   |                          |     |     |      |                                                       |
|-----------------|-------------------------------------|---|--------------------------|-----|-----|------|-------------------------------------------------------|
| OS1 – OS6       | Oslo Fjord,<br>North Sea            | L | 59°04.01'N<br>10°44.31'E | 115 | 8.2 | 35.2 | Raddatz et al.<br>(2013)                              |
| P391-1 – P391-3 | LoppHAVet,<br>Norwegian Sea         | L | 70°26.59'N<br>21°10.00'E | 230 | 6.5 | 35.1 | Raddatz et al.<br>(2013)                              |
| RL1-1 – RL1-4   | Trondheimfjord,<br>Norwegian Sea    | L | 63°28.61'N<br>9°59.72'E  | 240 | 8.1 | 31.2 | Dullo et al.<br>(2008),<br>Rüggeberg et al.<br>(2011) |
| RL4-1 – RL4-4   | Trondheimfjord,<br>Norwegian Sea    | L | 63°28.61'N<br>9°59.72'E  | 240 | 8.1 | 31.2 | Dullo et al.<br>(2008),<br>Rüggeberg et al.<br>(2011) |
| RL9-1 – RL9-5   | Trondheimfjord,<br>Norwegian Sea    | L | 63°28.61'N<br>9°59.72'E  | 240 | 8.1 | 31.2 | Dullo et al.<br>(2008),<br>Rüggeberg et al.<br>(2011) |
| SJ1 – SJ6       | Stjernesund Fjord,<br>Norwegian Sea | L | 70°16.04'N<br>22°27.37'E | 295 | 5.9 | 35   | Rüggeberg et al.<br>(2011)                            |
| SJ2-1 – SJ2-4   | Stjernesund Fjord,<br>Norwegian Sea | L | 70°16.04'N<br>22°27.37'E | 295 | 5.9 | 35   | Rüggeberg et al.<br>(2011)                            |
| TF1 – TF2       | Tautra Reef,<br>Norwegian Sea       | L | 63°35.36'N<br>10°31.23'E | 39  | 6   | 30.1 | Neulinger<br>(2008)                                   |
| TF2-1 – TF2-6   | Trondheimfjord,<br>Norwegian Sea    | L | 63°28.61'N<br>9°59.72'E  | 240 | 8.1 | 31.2 | Dullo et al.<br>(2008),<br>Rüggeberg et al.<br>(2011) |
| EFC1 – EFC6     | Sula Reef,<br>Norwegian Sea         | L | 64°05.93'N<br>8°05.47'E  | 286 | 7.6 | 35.3 | Raddatz et al.<br>(2013)                              |
| EFE1 – EFE4     | Sula Reef,<br>Norwegian Sea         | L | 64°05.93'N<br>8°05.47'E  | 286 | 7.6 | 35.3 | Raddatz et al.<br>(2013)                              |

**Table S1** Sample ident and location Metadata. Species abbreviations stand for L=*Lophelia pertusa*, M=*Madrepora oculata* and C=*Caryophyllia* sp.. Sample names such as A1-A4 relate to multiple samples that derive from the same coral specimen/calice.
