# Supplementary material for: Environmental and biological controls on Na / Ca ratios in scleractinian cold-water corals
Source: Copernicus journal article supplement (doi:10.5194/bg-2019-40), 2019-02-19
Supplement: Supplementary file [file bg-2019-40-AC2-supplement.pdf]

| Samplename | Location                                       | Coordinates                    | Waterdepth [m] | Temperature [°C] | Salinity [PSU] | pH   | Reference                                         |
|------------|------------------------------------------------|--------------------------------|----------------|------------------|----------------|------|---------------------------------------------------|
| A1 - A4    | Traenadjupet, Norwegian Sea                    | 66°58.40' 0'N<br>11°06.52' 9'E | 300            | 7.2              | 35.2           | 8.02 | Dullo et al. (2008), Rüggeberg et al. (2011)      |
| B1 - B2    | Whittard Canyon, Celtic Sea                    | 48°46.79' N<br>10°34.20' W     | 835            | 9.79             | 35.5           | 7.99 | Raddatz et al. (2013)                             |
| C1 - C2    | Stjernesund Fjord, Norwegian Sea               | 70°16.04' N<br>22°27.37' E     | 295            | 5.9              | 35             | 8.20 | Rüggeberg et al. (2011)                           |
| D1 - D4    | Little Galway Mound, Belgica Mound Province    | 51°26.51' N<br>11°45.43' W     | 881            | 8.96             | 35.53          | 7.99 | Dullo et al. (2008), Rüggeberg et al. (2011)      |
| E1 - E3    | Santa Maria di Leuca, Ionic Sea                | 39°125.0' 0'N<br>18°127.0' 0'E | 560-750        | 13.66            | 38.66          | 8.08 | Flögel et al. (2014)                              |
| F1 - F4    | Guilvinec Canyon, Bay of Biscay                | 46°56.20' N<br>5°21.60' W      | 800            | 10.29            | 35.6           | 8.08 | Raddatz et al. (2013)                             |
| G1 - G4    | Sotbakken, Norwegian Sea                       | 70°45.35' N<br>18°40.04' E     | 265            | 6.6              | 35.2           | 8.06 | Raddatz et al. (2013)                             |
| H1 - H3    | Galway Mound, Belgica Mound Province           | 51°26.94' N<br>11°45.16' E     | 837            | 9.54             | 35.53          | 7.99 | Dullo et al. (2008), Rüggeberg et al. (2011)      |
| I1 - I3    | Urania Bank, Strait of Sicily                  | 36°50.32' N<br>13°09.35' E     | 559            | 13.5             | 38.8           | 8.11 | Raddatz et al. (2013), López Correa et al. (2010) |
| J1 - J2    | Meknes Carbonate Mound Province, Gulf of Cadiz | 34.59.98' N<br>7°04.51' W      | 738            | 10.28            | 35.7           | 7.76 | Raddatz et al. (2013)                             |
| K1 - K5    | Trondheimfjord, Norwegian Sea                  | 63°28.61' N<br>9°59.72' E      | 240            | 8.1              | 31.2           | 8.03 | Dullo et al. (2008), Rüggeberg et al. (2011)      |
| LO1        | Bari Canyon, Adriatic Sea                      | 41°18.00' N<br>17°12.00' E     | 315-650        | 13.49            | 38.62          | 8.08 | Flögel et al. (2014)                              |
| MSS1       | Santa Maria di Leuca, Ionic Sea                | 39°25.00' N<br>18°27.00' E     | 560-750        | 13.66            | 38.66          | 8.08 | Flögel et al. (2014)                              |
| MA1        | Bari Canyon, Adriatic Sea                      | 41°18.00' N<br>17°12.00' E     | 315-650        | 13.49            | 38.62          | 8.08 | Flögel et al. (2014)                              |

|             |                                                     |                                    |     |       |        |      |                                                                |
|-------------|-----------------------------------------------------|------------------------------------|-----|-------|--------|------|----------------------------------------------------------------|
| MSM1        | Campeche Bank,<br>Gulf of Mexico                    | 23°50.12<br>1'N<br>87°10.48<br>4'W | 565 | 10.59 | 35.24  | 7.94 | WOA 2013<br>(Locarnini et al.,<br>2013; Zweng et<br>al., 2013) |
| MSM2        | Great Bahama Bank<br>Mound E,<br>Northwest Atlantic | 24°35.62<br>3'N<br>79°16.80<br>8'W | 579 | 9.24  | 35.084 | 7.94 | WOA 2013<br>(Locarnini et al.,<br>2013; Zweng et<br>al., 2013) |
| MSM3        | Great Bahama Bank<br>Mound B,<br>Northwest Atlantic | 24°33.84<br>8'N<br>79°19.81<br>1'W | 616 | 9.27  | 35.1   | 7.94 | WOA 2013<br>(Locarnini et al.,<br>2013; Zweng et<br>al., 2013) |
| MSM4        | Southwest Florida,<br>Gulf of Mexico                | 24°58.16<br>4'N<br>84°17.97<br>3'W | 483 | 8.29  | 35.17  | 7.85 | WOA 2013<br>(Locarnini et al.,<br>2013; Zweng et<br>al., 2013) |
| ALB1        | El Idrissi Bank,<br>Alboran Sea                     | 36°06.31'<br>N<br>3°29.33'<br>W    | 647 | 12.98 | 38.464 | 8.06 | WOA 2013<br>(Locarnini et al.,<br>2013; Zweng et<br>al., 2013) |
| KRS1        | Northeastern Red<br>Sea                             | 27°42.30<br>6'N<br>35°09.04<br>6'E | 954 | 21.66 | 40.55  | 7.94 | WOA 2013<br>(Locarnini et al.,<br>2013; Zweng et<br>al., 2013) |
| KRS2        | Northeastern Red<br>Sea                             | 22°17.85<br>7'N<br>38°53.64<br>8'E | 580 | 21.66 | 40.55  | 7.94 | WOA 2013<br>(Locarnini et al.,<br>2013; Zweng et<br>al., 2013) |
| KRS3        | Northeastern Red<br>Sea                             | 27°42.30<br>6'N<br>35°09.04<br>6'E | 954 | 21.66 | 40.55  | 7.94 | WOA 2013<br>(Locarnini et al.,<br>2013; Zweng et<br>al., 2013) |
| KRS4        | Northeastern Red<br>Sea                             | 27°42.30<br>6'N<br>35°09.04<br>6'E | 954 | 21.66 | 40.55  | 7.94 | WOA 2013<br>(Locarnini et al.,<br>2013; Zweng et<br>al., 2013) |
| KRS5        | Northeastern Red<br>Sea                             | 22°46.14<br>9'N<br>38°02.94<br>4'E | 625 | 21.66 | 40.55  | 7.94 | WOA 2013<br>(Locarnini et al.,<br>2013; Zweng et<br>al., 2013) |
| L10-1       | Tautra Reef,<br>Norwegian Sea                       | 63°35.36'<br>N<br>10°31.23'<br>E   | 39  | 6     | 30.1   | 7.99 | Neulinger<br>(2008)                                            |
| L2-1 – L2-2 | Lopphavet,<br>Norwegian Sea                         | 70°26.80'<br>N<br>21°10.38'<br>E   | 230 | 6.5   | 35.1   | 8.06 | Raddatz et al.<br>(2013)                                       |

|                 |                                     |                                  |     |     |      |      |                                                       |
|-----------------|-------------------------------------|----------------------------------|-----|-----|------|------|-------------------------------------------------------|
| L3-1 – L3-2     | Lopphavet,<br>Norwegian Sea         | 70°26.80'<br>N<br>21°10.38'<br>E | 230 | 6.5 | 35.1 | 8.06 | Raddatz et al.<br>(2013)                              |
| L5-1 – L5-2     | Stjernesund Fjord,<br>Norwegian Sea | 70°16.04'<br>N<br>22°27.37'<br>E | 295 | 5.9 | 35   | 8.20 | Rüggeberg et al.<br>(2011)                            |
| L6-1 – L6-2     | Sula Reef,<br>Norwegian Sea         | 64°05.93'<br>N<br>8°05.47'E      | 286 | 7.6 | 35.3 | 8.08 | Raddatz et al.<br>(2013)                              |
| L7-1 – L7-2     | Sula Reef,<br>Norwegian Sea         | 64°05.93'<br>N<br>8°05.47'E      | 286 | 7.6 | 35.3 | 8.08 | Raddatz et al.<br>(2013)                              |
| L8-1 – L8-2     | Nordleksa,<br>Norwegian Sea         | 63°36.43'<br>N<br>9°22.66'E      | 155 | 7.8 | 35   | 8.03 | Dr. S. Flögel                                         |
| LR1 – LR6       | Lopphavet,<br>Norwegian Sea         | 70°26.59'<br>N<br>21°10.00'<br>E | 230 | 6.5 | 35.1 | 8.05 | Raddatz et al.<br>(2013)                              |
| LW1 – LW5       | Lopphavet,<br>Norwegian Sea         | 70°26.59'<br>N<br>21°10.00'<br>E | 230 | 6.5 | 35.1 | 8.05 | Raddatz et al.<br>(2013)                              |
| NL-1 – NL6      | Nordleksa,<br>Norwegian Sea         | 63°36.43'<br>N<br>9°22.66'E      | 155 | 7.8 | 35   | 8.03 | Dr. S. Flögel                                         |
| OS1 – OS6       | Oslo Fjord,<br>North Sea            | 59°04.01'<br>N<br>10°44.31'<br>E | 115 | 8.2 | 35.2 | 7.98 | Raddatz et al.<br>(2013)                              |
| P391-1 – P391-3 | Lopphavet,<br>Norwegian Sea         | 70°26.59'<br>N<br>21°10.00'<br>E | 230 | 6.5 | 35.1 | 8.05 | Raddatz et al.<br>(2013)                              |
| RL1-1 – RL1-4   | Trondheimfjord,<br>Norwegian Sea    | 63°28.61'<br>N<br>9°59.72'E      | 240 | 8.1 | 31.2 | 8.03 | Dullo et al.<br>(2008),<br>Rüggeberg et al.<br>(2011) |
| RL4-1 – RL4-4   | Trondheimfjord,<br>Norwegian Sea    | 63°28.61'<br>N<br>9°59.72'E      | 240 | 8.1 | 31.2 | 8.03 | Dullo et al.<br>(2008),<br>Rüggeberg et al.<br>(2011) |
| RL9-1 – RL9-5   | Trondheimfjord,<br>Norwegian Sea    | 63°28.61'<br>N<br>9°59.72'E      | 240 | 8.1 | 31.2 | 8.03 | Dullo et al.<br>(2008),<br>Rüggeberg et al.<br>(2011) |
| SJ1 – SJ6       | Stjernesund Fjord,<br>Norwegian Sea | 70°16.04'<br>N<br>22°27.37'<br>E | 295 | 5.9 | 35   | 8.20 | Rüggeberg et al.<br>(2011)                            |
| SJ2-1 – SJ2-4   | Stjernesund Fjord,<br>Norwegian Sea | 70°16.04'<br>N<br>22°27.37'<br>E | 295 | 5.9 | 35   | 8.20 | Rüggeberg et al.<br>(2011)                            |

|               |                                  |                                  |     |     |      |      |                                                       |
|---------------|----------------------------------|----------------------------------|-----|-----|------|------|-------------------------------------------------------|
| TF1 – TF2     | Tautra Reef,<br>Norwegian Sea    | 63°35.36'<br>N<br>10°31.23'<br>E | 39  | 6   | 30.1 | 7.99 | Neulinger<br>(2008)                                   |
| TF2-1 – TF2-6 | Trondheimfjord,<br>Norwegian Sea | 63°28.61'<br>N<br>9°59.72'E      | 240 | 8.1 | 31.2 | 7.99 | Dullo et al.<br>(2008),<br>Rüggeberg et al.<br>(2011) |
| EFC1 – EFC6   | Sula Reef,<br>Norwegian Sea      | 64°05.93'<br>N<br>8°05.47'E      | 286 | 7.6 | 35.3 | 8.03 | Raddatz et al.<br>(2013)                              |
| EFE1 – EFE4   | Sula Reef,<br>Norwegian Sea      | 64°05.93'<br>N<br>8°05.47'E      | 286 | 7.6 | 35.3 | 8.08 | Raddatz et al.<br>(2013)                              |

**Table S1 Sample ident and location Metadata. Sample names such as A1-A4 relate to multiple samples that derive from the same coral specimen/calice.**

| Samplename | Species | Na/Ca<br>[mmol/mol] | Mg/Ca<br>[mmol/mol] | Sr/Ca<br>[mmol/mol] |
|------------|---------|---------------------|---------------------|---------------------|
| A1 - A4    | D       | 29.02               | 3.83                | 10.23               |
| B1 - B2    | D       | 24.87               | 3.17                | 9.91                |
| C1 - C2    | D       | 29.25               | 3.97                | 9.95                |
| D1 - D4    | D       | 27.57               | 3.94                | 10.01               |
| E1 - E3    | D       | 24.14               | 4.03                | 9.84                |
| F1 - F4    | D       | 24.61               | 3.56                | 10.05               |
| G1 - G4    | D       | 31.04               | 4.25                | 10.18               |
| H1 - H3    | D       | 23.93               | 3.62                | 10.21               |
| I1 - I3    | D       | 23.75               | 3.99                | 9.65                |
| J1 - J2    | D       | 21.2                | 2.45                | 10.35               |
| K1 - K5    | D       | 28.72               | 7.84                | 9.6                 |
| LO1        | D       | 26.74               | 3.94                | 10                  |
| MSS1       | D       | 26.85               | 5.41                | 10.03               |
| MA1        | M       | 25.18               | 3.73                | 10.47               |

|             |   |       |      |       |
|-------------|---|-------|------|-------|
| MSM1        | D | 66.24 | 7.71 | 10.31 |
| MSM2        | D | 30.17 | 6.38 | 10.42 |
| MSM3        | M | 56.92 | 9.98 | 10.62 |
| MSM4        | D | 25.43 | 3.04 | 10.22 |
| ALB1        | D | 49.9  | 3.82 | 10.08 |
| KRS1        | C | 45.84 | 4.37 | 9.94  |
| KRS2        | C | 22.33 | 4.47 | 10.15 |
| KRS3        | C | 20.91 | 4.73 | 9.46  |
| KRS4        | C | 20.49 | 2.81 | 9.78  |
| KRS5        | C | 20.78 | 3.49 | 10.36 |
| L10-1       | D | 21.12 | 2.2  | 10    |
| L2-1 – L2-2 | D | 24.61 | 3.04 | 10.11 |

|                 |   |       |      |       |
|-----------------|---|-------|------|-------|
| L3-1 – L3-2     | D | 24.58 | 3.19 | 10.36 |
| L5-1 – L5-2     | D | 23.43 | 3.1  | 10.39 |
| L6-1 – L6-2     | D | 23.79 | 3.68 | 10.26 |
| L7-1 – L7-2     | D | 25.45 | 3.49 | 10.41 |
| L8-1 – L8-2     | D | 23.67 | 3.23 | 10.21 |
| LR1 – LR6       | D | 27.18 | 3.34 | 10.31 |
| LW1 – LW5       | D | 26.23 | 3.79 | 9.63  |
| NL-1 – NL6      | D | 28.14 | 4.67 | 9.9   |
| OS1 – OS6       | D | 24.81 | 5.73 | 9.7   |
| P391-1 – P391-3 | D | 24.45 | 6.26 | 10.38 |
| RL1-1 – RL1-4   | D | 21.32 | 3.03 | 10.27 |
| RL4-1 – RL4-4   | D | 24.36 | 4.72 | 10.38 |
| RL9-1 – RL9-5   | D | 22.68 | 3.41 | 10.26 |
| SJ1 – SJ6       | D | 28.64 | 4.51 | 10.07 |
| SJ2-1 – SJ2-4   | D | 29.38 | 5.37 | 10.42 |

|               |   |       |      |       |
|---------------|---|-------|------|-------|
| TF1 – TF2     | D | 25.72 | 6.1  | 10.13 |
| TF2-1 – TF2-6 | D | 21.42 | 3.78 | 10.2  |
| EFC1 – EFC6   | D | 26.01 | 4.31 | 9.94  |
| EFE1 – EFE4   | D | 27.1  | 3.8  | 10.31 |

**Table S2 Results of the ICP-OES measurements. Red values are identified as outliers and not considered for further calculations.**

**Species abbreviations stand for D=*Desmophyllum pertusum* , M=*Madrepora oculata* and C=*Caryophylliidae*. Sample names such as A1-A4 relate to multiple samples that derive from the same coral specimen/calice.**
